# Supplementary material for: Characterization of the consensus mucosal microbiome of colorectal cancer
Source: bioRxiv or medRxiv preprint supplement (doi:10.1101/2021.06.02.446807), 2021-06-02
Supplement: Supplementary file [file media-1.pdf]

## **SUPPLEMENTARY MATERIALS**

### **TITLE**

**Characterization of the consensus mucosal microbiome of colorectal cancer**

### **Authors**

Lan Zhao<sup>1</sup>, Susan M. Grimes<sup>1</sup>, Stephanie U. Greer<sup>1</sup>, Matthew Kubit<sup>1</sup>, Hojoon Lee<sup>1</sup>, Lincoln Nadauld<sup>3</sup>, Hanlee P. Ji<sup>1,2</sup>

### **Institutions**

<sup>1</sup>Division of Oncology, Department of Medicine, Stanford University School of Medicine, Stanford, CA, United States

<sup>2</sup>Stanford Genome Technology Center, Stanford University, Palo Alto, CA, United States

<sup>3</sup>Intermountain Precision Genomics Program, Intermountain Healthcare, Saint George, UT, 84790, United States

### **Corresponding author**

Hanlee P. Ji

Email: [genomics\\_ji@stanford.edu](mailto:genomics_ji@stanford.edu)

CCSR 1115, 269 Campus Drive, Stanford, CA-94305, USA

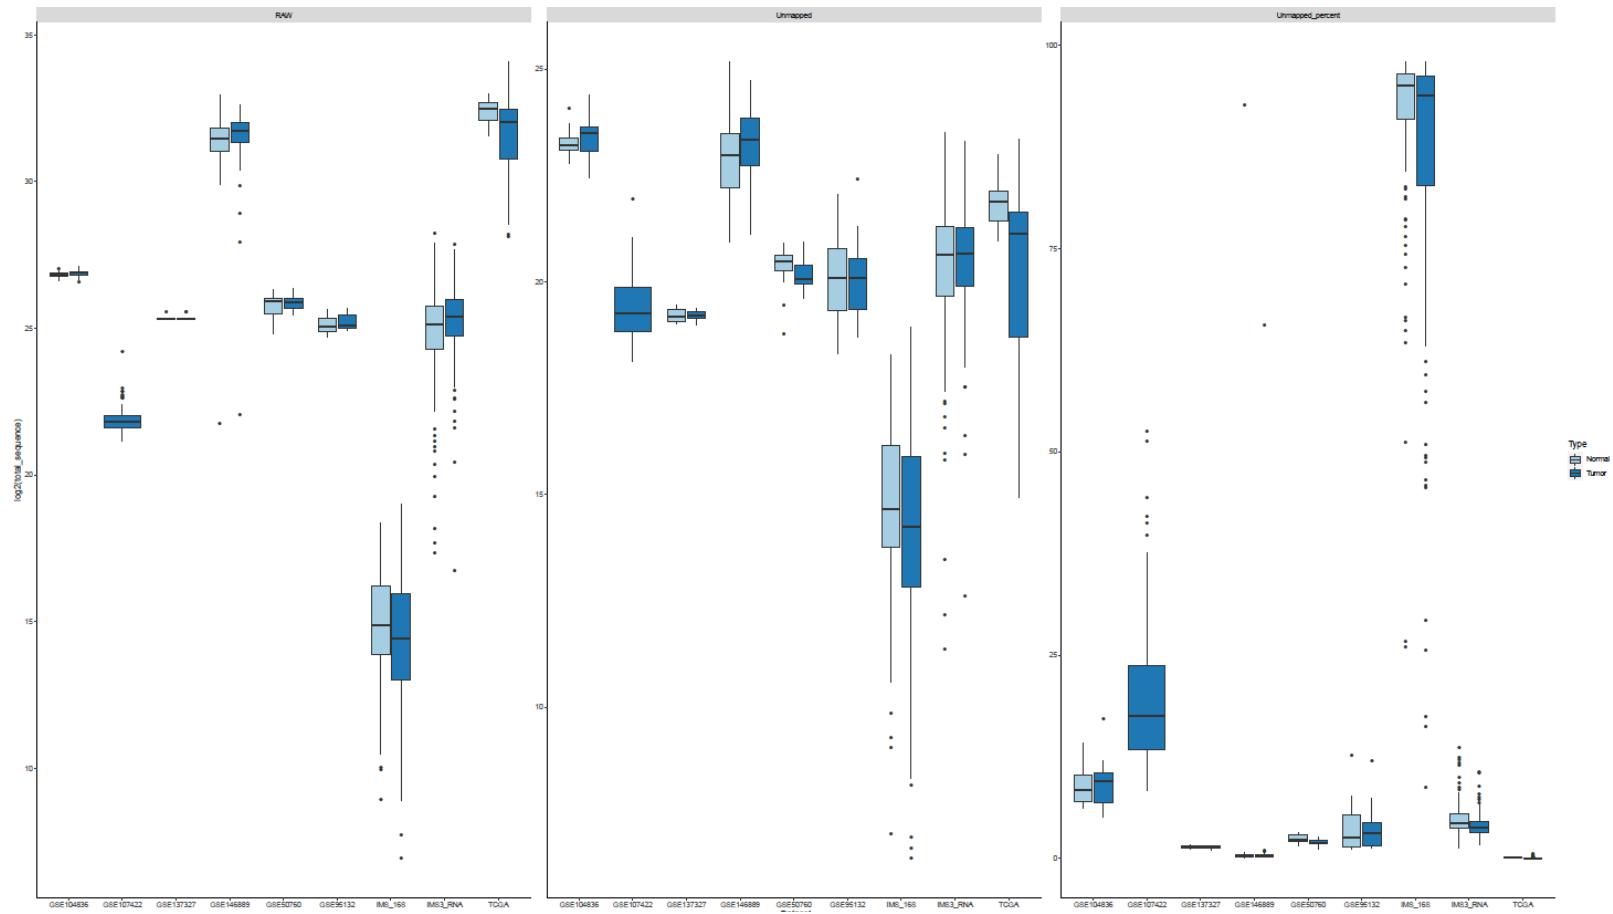

**Supplemental Figure 1. Sequence reads tracking for each dataset involved in the study.** X-axis are the names of the eight datasets. The Y-axis is for the RAW and Unmapped panels are the log2 scaled total sequences; Y-axis for the 'Unmapped\_percent' panel indicates the percentages of the unmapped reads. The values in the Y-axis were plotted with standard error bars for each sample set included in a dataset.

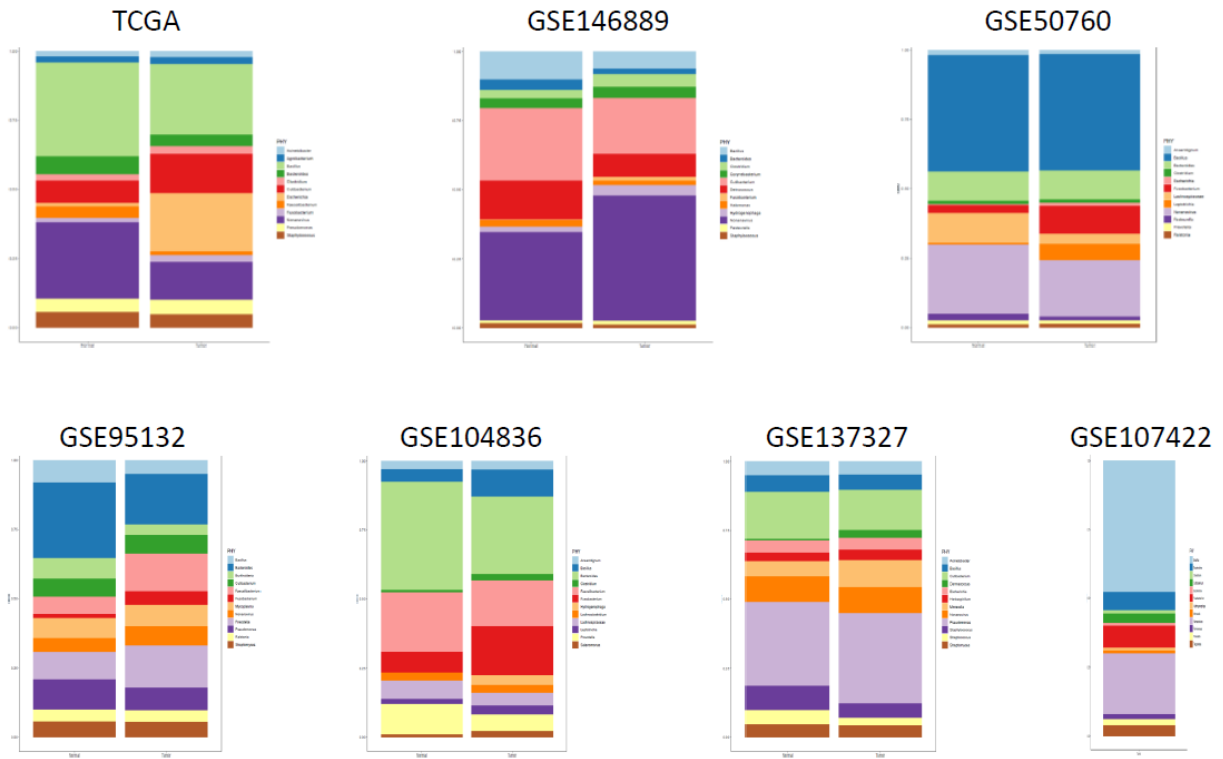

**Supplemental Figure 2. Genus-level microbial compositional changes for each dataset.**  
 The top 12 most enriched genera identified from each cohort: TCGA, GSE146889, GSE50760, GSE95132, GSE104836, GSE137327, and GSE107422.

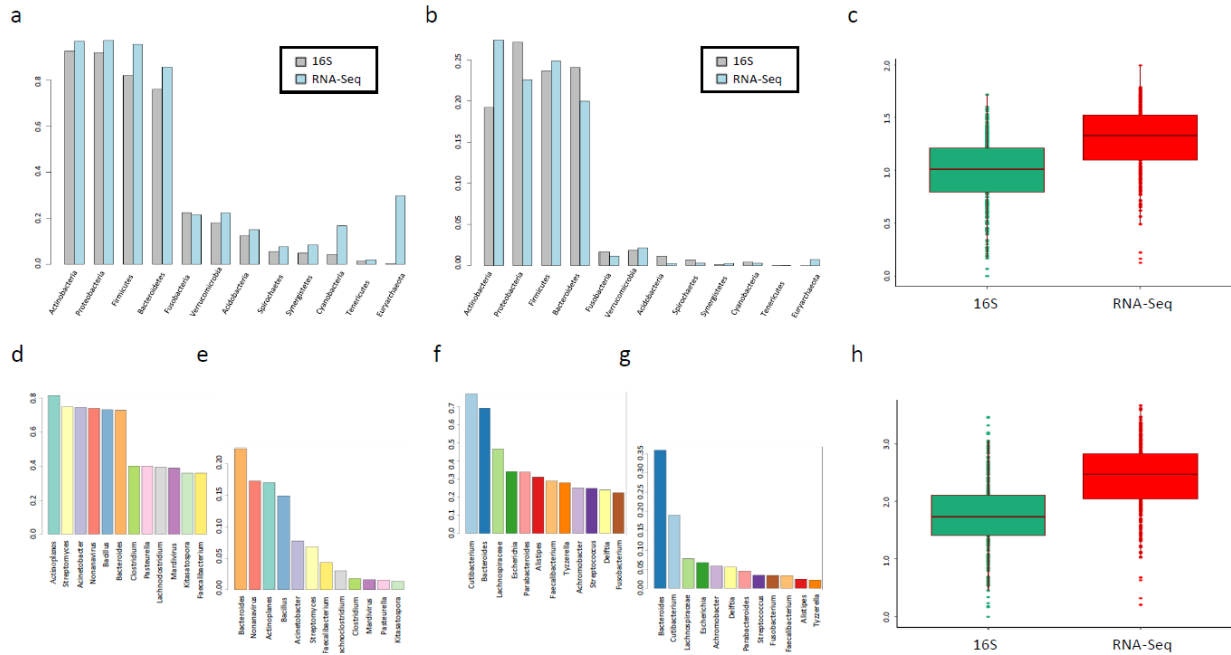

**Supplemental Figure 3. Microbial compositional and abundance comparisons between 16S and RNA-Seq at the Phylum- and Genus-level.** Prevalent (a) and abundant (b) phyla values identified from 16S and RNA-Seq platforms. Most prevalent (d-e) and abundant (f-g) phyla identified from 16S and RNA-Seq platforms. The boxplots of microbial diversity through the Shannon index comparisons at the phylum (c) and genus (h) levels.

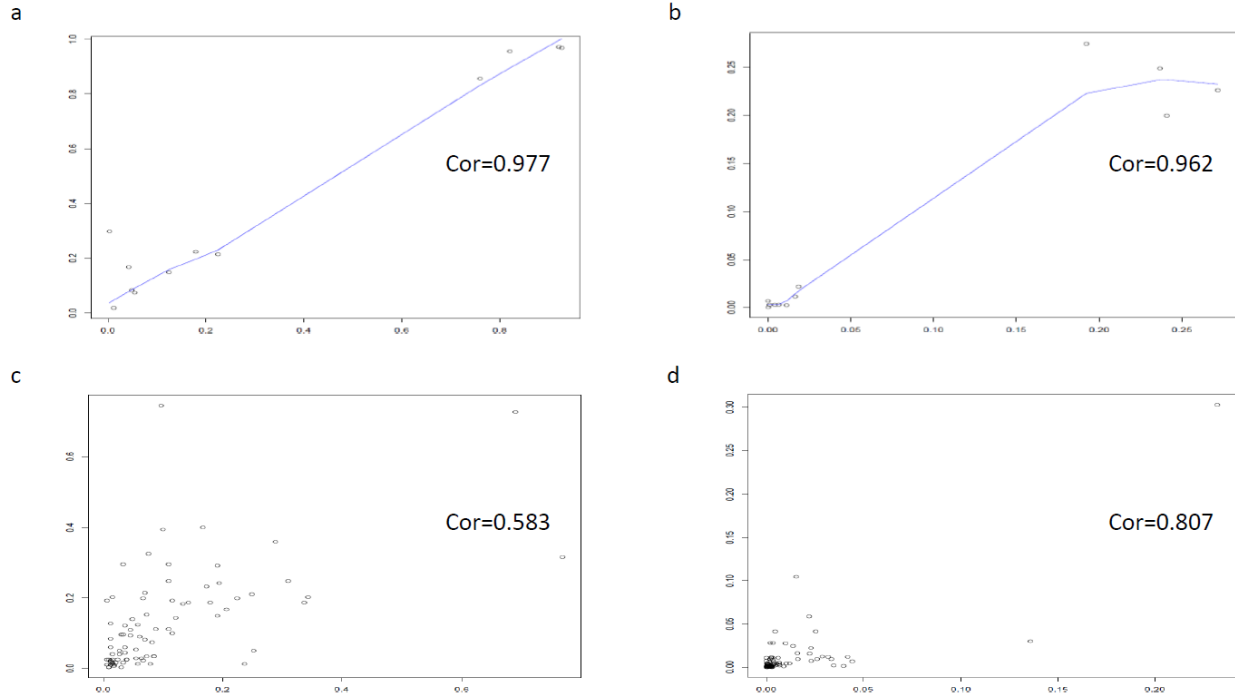

**Supplemental Figure 4. Pearson correlation coefficients between 16S and RNA-Seq at the Phylum- and Genus-level.** Phylum-level prevalence (a) and abundances (b) between 16S and RNA-Seq data; Genus-level prevalence (c) and abundances (d) between 16S and RNA-Seq data.

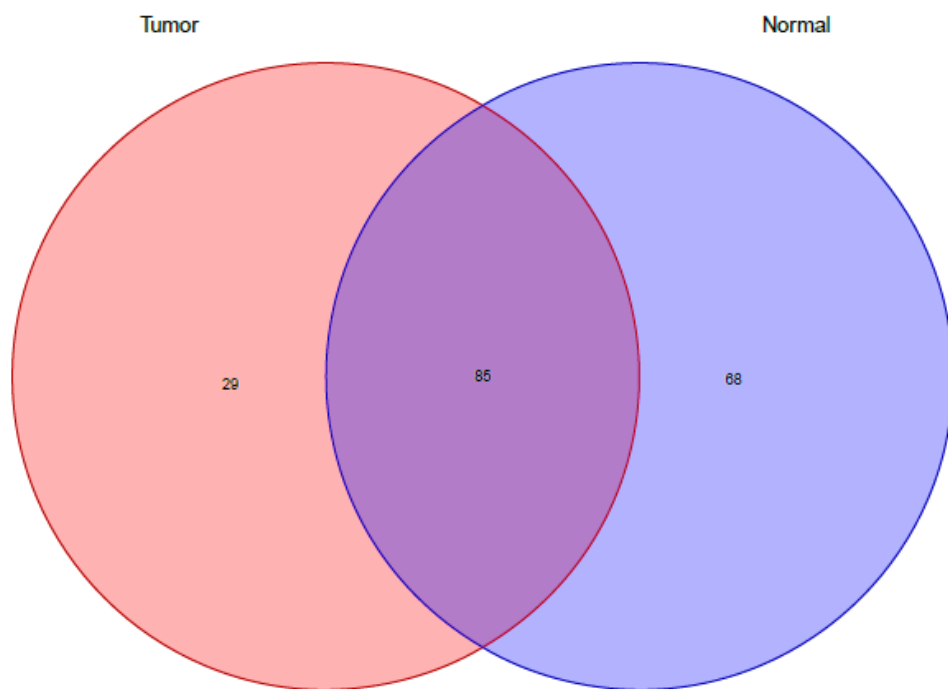

**Supplemental Figure 5. Venn diagram of the consensus microbial species between tumor and normal samples.** Venn diagram showing the number of overlapped and unique species between tumor and normal groups.
